# Supplementary figures and images for: Find the weakest link. A comparison between demographic, genetic and demo-genetic metapopulation extinction times
Source: Springer Nature journal article supplement (doi:10.1186/1471-2148-11-260), 2011-09-19

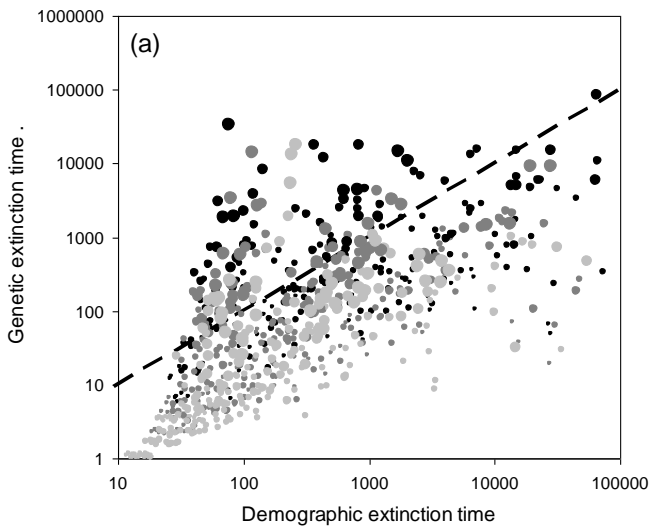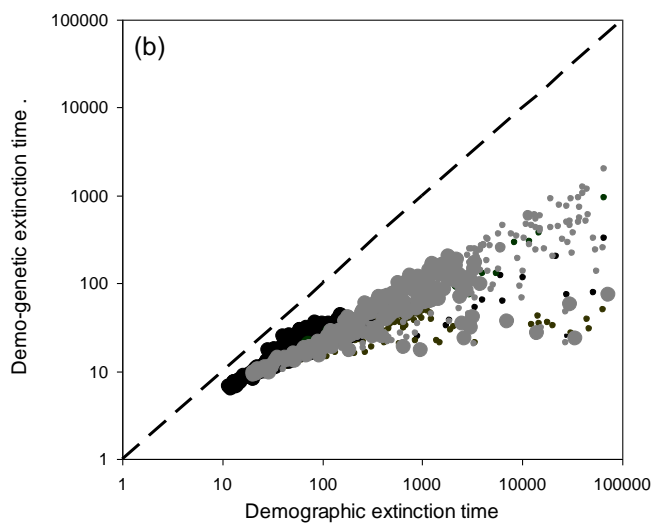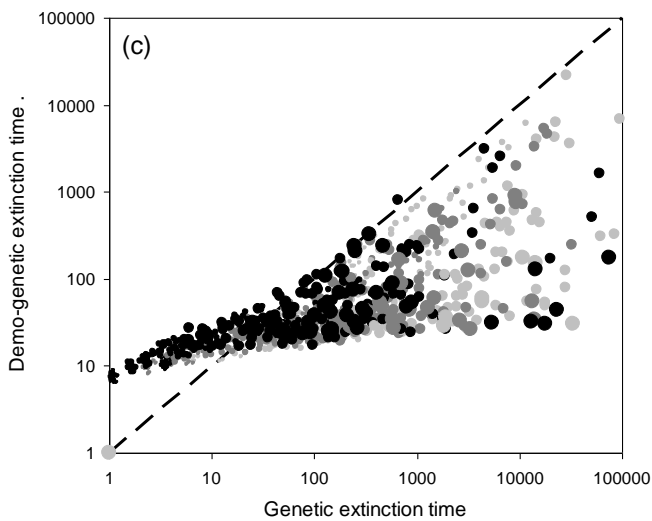

Supplement: 12862_2011_1865_MOESM6_ESM.pdf [file 12862_2011_1865_MOESM6_ESM.pdf]
